# Supplementary material
Source: ML conference proceedings conference paper supplement (https://openaccess.thecvf.com/content/CVPR_2019/html/Yang_Modeling_Point_Clouds_CVPR_2019_paper.html)
Supplement: Supplementary file 1 [file Yang_Modeling_Point_Clouds_CVPR_2019_supplemental.pdf]

## Appendix

### A. Proof of Permutation Equivariance of Group Shuffle Attention

**Lemma 1** (Permutation matrix and permutation function).  $\forall \Lambda \in \mathbb{R}^{N \times N}$ ,  $\forall$  permutation matrix  $P$  of size  $N$ ,  $\exists p : \{1, 2, \dots, N\} \rightarrow \{1, 2, \dots, N\}$  is a permutation function:

$$\Lambda_{ij} = (P \cdot \Lambda)_{p(i)p(j)} = (\Lambda \cdot P^T)_{ip(j)} = (P \cdot \Lambda \cdot P^T)_{p(i)p(j)}. \quad (15)$$

**Lemma 2.** Given  $A \in \mathbb{R}^{N \times N}$ ,  $\forall$  permutation matrix  $P$  of size  $N$ ,

$$\text{softmax}(PAP^T) = P\text{softmax}(A)P^T. \quad (16)$$

*Proof.*  $\text{softmax}(A)_{ij} = \frac{e^{A_{ij}}}{\sum_{n=1}^N e^{A_{in}}}$ .

Consider a permutation function  $p$  for  $P$ , using Eq. 15, we get:

$$\begin{aligned} (P \cdot \text{softmax}(A) \cdot P^T)_{p(i)p(j)} &= \text{softmax}(A)_{ij} \\ &= \frac{e^{A_{ij}}}{\sum_{n=1}^N e^{A_{in}}} \\ &= \frac{e^{(PAP^T)_{p(i)p(j)}}}{\sum_{n=1}^N e^{(PAP^T)_{p(i)p(n)}}} \\ &= \text{softmax}(P \cdot A \cdot P^T)_{p(i)p(j)}. \end{aligned}$$

which implies  $P \cdot \text{softmax}(A) \cdot P^T = \text{softmax}(P \cdot A \cdot P^T)$ .  $\square$

**Lemma 3.** Non-linear self-attention  $\text{Attn}_\sigma(Q, X) = S(Q, X) \cdot \sigma(X)$ , with  $S(Q, X) = \text{softmax}(QX^T/\sqrt{c})$  is permutation-equivariant.

*Proof.* For a self-attention,  $Q = X$ .

$\sigma$  is an element-wise function, thus  $\sigma(P \cdot X) = P \cdot \sigma(X)$ .

$$\begin{aligned} \text{Attn}_\sigma(PX, PX) &= S(PX, PX) \cdot \sigma(PX) \\ &= \text{softmax}(P \cdot XX^T \cdot P^T / \sqrt{c}) \cdot P \cdot \sigma(X) \\ &= P \cdot \text{softmax}(XX^T / \sqrt{c}) \cdot P^T \cdot P \cdot \sigma(X) \\ &= P \cdot \text{softmax}(XX^T / \sqrt{c}) \cdot \sigma(X) \\ &= P \cdot \text{Attn}_\sigma(X, X). \end{aligned}$$

which implies non-linear self-attention is permutation-equivariant.  $\square$

**Proposition 1.** The Group Shuffle Attention operation is permutation-equivariant, i.e., given input  $X \in \mathbb{R}^{N \times c}$ ,  $\forall$  permutation matrix  $P$  of size  $N$ ,

$$\text{GSA}(P \cdot X) = P \cdot \text{GSA}(X).$$

*Proof.*

$$\text{GSA}(X) = \mathcal{GN}(\psi(\text{GroupAttn}(X)) + X), \quad (11)$$

where,

$$\begin{aligned} \text{GroupAttn}(X) &= \\ \text{concat}\{\text{Attn}_\sigma(X_i, X_i) \mid X_i = X^{(i)} W_i\}_{i=1, \dots, g}. \end{aligned} \quad (8)$$

$\text{GSA}$  only introduces element-wise operations, which does not change the permutation-equivariance of  $\text{Attn}_\sigma$ .  $\square$

### B. Proof of Permutation Invariance of Gumbel Subset Sampling

**Proposition 1.** The Gumbel Subset Sampling operation is permutation-invariant, i.e., given input  $X \in \mathbb{R}^{N \times c}$ ,  $\forall$  permutation matrix  $P$  of size  $N$ ,

$$\text{GSS}(P \cdot X) = \text{GSS}(X).$$

*Proof.* According to Eq. 14,

$$\text{GSS}(X) = \text{gumbel\_softmax}(WX^T) \cdot X, \quad W \in \mathbb{R}^{N \times c}.$$

Similar to Lemma 2,

$$\text{softmax}(AP^T) = \text{softmax}(A)P^T. \quad (17)$$

Since  $\text{gumbel\_softmax}$  add element-wise operations on  $\text{softmax}$ , it does not change the permutation property. In this way,

$$\begin{aligned} \text{GSS}(P \cdot X) &= \text{gumbel\_softmax}(WX^T P^T) \cdot PX \\ &= \text{gumbel\_softmax}(WX^T) P^T \cdot PX \\ &= \text{gumbel\_softmax}(WX^T) \cdot X \\ &= \text{GSS}(X). \end{aligned}$$

$\square$
